# Supplementary material
Source: Springer Nature journal article supplement (https://www.springermedizin.de/resource/supplementary/12939_2007_132_MOESM2_ESM.pdf/9551550)
Supplement: MOESM2 [file 9551550]

**NMR per 1000 live births**

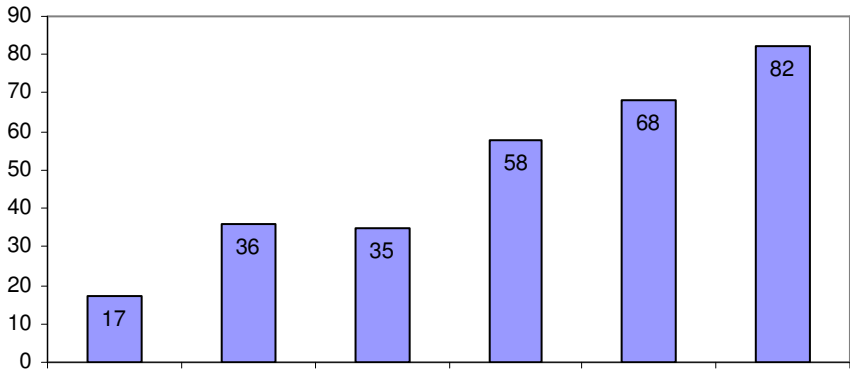

HLH catchment area 1995/96

DHS Tanzania 1996

WHO Tanzania 2004

Kwimba/Missungwi districts

Kwimba district 1989-91

Iringa district 1983-85
